# Supplementary material
Source: Springer Nature journal article supplement (https://www.springermedizin.de/resource/supplementary/12871_2006_38_MOESM2_ESM.pdf/9429526)
Supplement: MOESM2 [file 9429526]

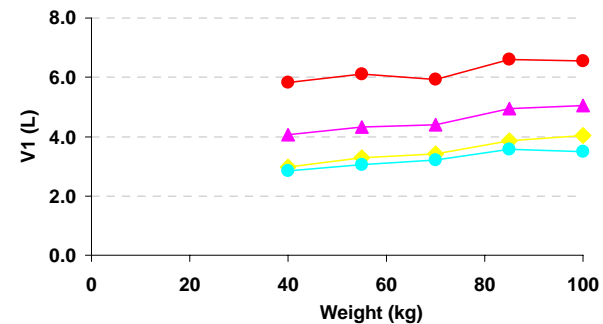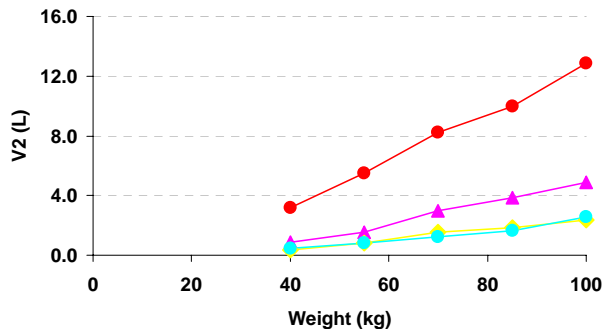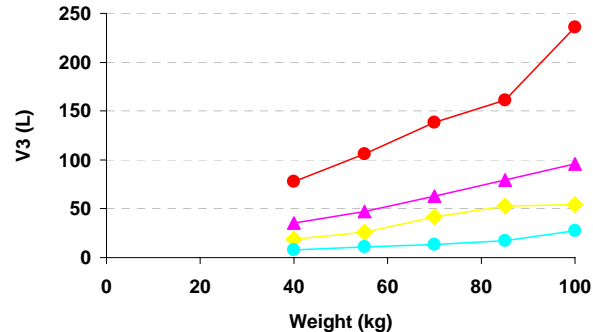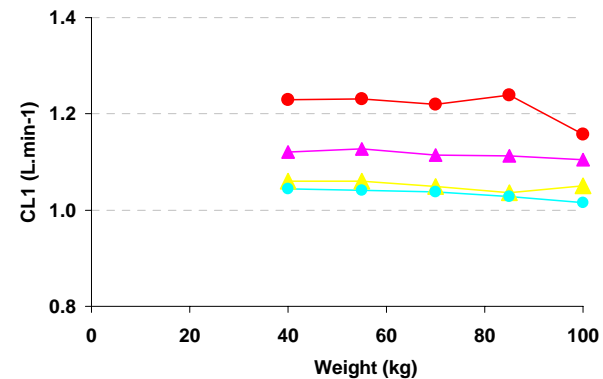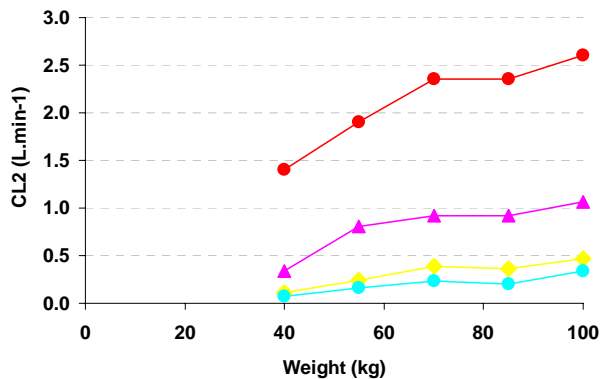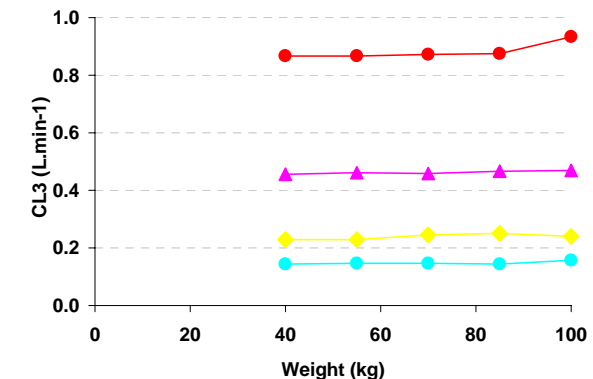

V1-V3: volumes of distribution; CL1-CL3: clearances.

● halothane, ● isoflurane, ● sevoflurane, and ● desflurane.
